# Supplementary material for: Weight Loss After Participation in a National VA Weight Management Program Among Veterans With or Without PTSD
Source: Atypon-hosted journal article supplement (doi:10.1176/appi.ps.201300404), 2014-08-15
Supplement: appi.ps.201300404.ds001.pdf [file appi.ps.201300404.ds001.pdf]

**Appendix Table 1.** Multivariate associations with total weight loss at 6 and 12 months among MOVE! participants with intense and sustained participation (FY2008-2012)

|                                                                | 6 month Weight Loss<br>(N=16,551) |                 | 12 month Weight Loss<br>(N=13,270) |                   |
|----------------------------------------------------------------|-----------------------------------|-----------------|------------------------------------|-------------------|
|                                                                | Pounds                            | 95% CI          | Pounds                             | 95% CI            |
| <b>Demographic characteristics</b>                             |                                   |                 |                                    |                   |
| Age (centered)                                                 | .74                               | .47 to 1.01***  | .81                                | .39 to 1.21***    |
| Male vs. Female Sex                                            | -.95                              | -1.64 to -.26** | -2.46                              | -3.50 to -1.41*** |
| Race                                                           |                                   |                 |                                    |                   |
| Non-Hispanic White vs. Black                                   | 2.24                              | 1.71 to 2.76*** | 2.29                               | 1.51 to 3.09***   |
| Other vs. Black                                                | 1.98                              | .84 to 3.12***  | 2.65                               | .96 to 4.34**     |
| Other vs. Non-Hispanic White                                   | -.26                              | -1.33 to .82    | .36                                | -1.23 to 1.94     |
| Married vs. unmarried                                          | .74                               | .31 to 1.17***  | .17                                | -.48 to .82       |
| Operation Enduring Freedom/<br>Operation Iraqi Freedom vs. not | -.39                              | -.79 to 1.57    | -.56                               | -2.42 to 1.29     |
| Service Connected vs. not                                      | .16                               | -.29 to .61     | .05                                | -.63 to .73       |
| <b>Health Characteristics</b>                                  |                                   |                 |                                    |                   |
| Charlson Co-morbidity Index                                    | -.68                              | -.81 to -.54*** | -.69                               | -.89 to -.49***   |
| Baseline weight                                                | .05                               | .04 to .05***   | .06                                | .06 to .07***     |
| Psychotropic Medication                                        | -.62                              | -1.15 to -.08*  | -.83                               | -1.60 to -.05*    |
| PTSD vs. no mental health<br>diagnoses                         | -.72                              | -1.32 to -.12*  | -1.01                              | -1.91 to -.11*    |
| Other mental health vs. no<br>mental health diagnoses          | -.51                              | -1.01 to -.02*  | -.73                               | -1.48 to .02      |
| PTSD vs. Other mental health<br>diagnoses                      | -.20                              | -.77 to .36     | -.28                               | -1.12 to .56      |

\*p&lt;.05; \*\*p&lt;.01; \*\*\*p&lt;.001

**Appendix Table 2.** Multivariate associations with  $\geq 5\%$  body weight loss at 6 and 12 Months among MOVE! participants with intense and sustained participation (FY2008-2012)

|                                                            | 6 months (N=16,551) |                   | 12 months (N=13,270) |                   |
|------------------------------------------------------------|---------------------|-------------------|----------------------|-------------------|
|                                                            | OR                  | (95% CI)          | OR                   | (95% CI)          |
| <b>Demographic characteristics</b>                         |                     |                   |                      |                   |
| Age (centered)                                             | 1.04                | .99 to 1.09       | 1.06                 | 1.00 to 1.12*     |
| Male vs. Female sex                                        | .95                 | .84 to 1.08       | .73                  | .63 to .84***     |
| Race                                                       |                     |                   |                      |                   |
| Non-Hispanic White vs. Black                               | 1.55                | 1.40 to 1.71***   | 1.39                 | 1.24 to 1.55***   |
| Other vs. Black                                            | 1.47                | 1.19 to 1.82***   | 1.27                 | 1.00 to 1.60*     |
| Other vs. Non-Hispanic White                               | .95                 | .78 to 1.16       | .91                  | .73 to 1.14       |
| Married vs. unmarried                                      | 1.09                | 1.01 to 1.18*     | .93                  | .86 to 1.02       |
| Operation Enduring Freedom/Operation Iraqi Freedom vs. not | .98                 | .79 to 1.21       | .85                  | .66 to 1.11       |
| Service-Connected vs. not                                  | .97                 | .89 to 1.04       | .96                  | .87 to 1.05       |
| <b>Health Characteristics</b>                              |                     |                   |                      |                   |
| Charlson Co-morbidity Index                                | .91                 | .89 to .94***     | .93                  | .91 to .96***     |
| Baseline Weight                                            | 1.00                | 1.001 to 1.003*** | 1.00                 | 1.003 to 1.005*** |
| Psychotropic Medication                                    | .99                 | .90 to 1.09       | .99                  | .89 to 1.11       |
| PTSD vs. no mental health diagnoses                        | .89                 | .79 to .99*       | 1.03                 | .92 to 1.17       |
| Other mental health vs. no mental health diagnoses         | .94                 | .86 to 1.03       | .98                  | .89 to 1.09       |
| PTSD vs. Other mental health diagnoses                     | .95                 | .85 to 1.05       | 1.05                 | .94 to 1.18       |

\*p<.05; \*\*p<.01; \*\*\*p<.001
